# Supplementary material for: Estimating tumor mutational burden from RNA-sequencing without a matched-normal sample
Source: PubMed Central journal article supplement (PMC9163107; doi:10.1038/s41467-022-30753-2), 2022-06-02
Supplement: 41467_2022_30753_MOESM2_ESM.pdf [file 41467_2022_30753_MOESM2_ESM.pdf]

## **Description of Additional Supplementary Information**

Supplementary Code: Code for running the ML pipeline

Supplementary Data: Supplementary raw data for all figures
